# Supplementary material for: Immunoreactivity of Plasminogen Activator Inhibitor 1 and Its Correlation with Dysmenorrhea and Lesional Fibrosis in Adenomyosis
Source: PubMed Central journal article supplement (PMC8289782; doi:10.1007/s43032-021-00513-6), 2021-03-08

**Supplemental Figure 1.** Study flow chart

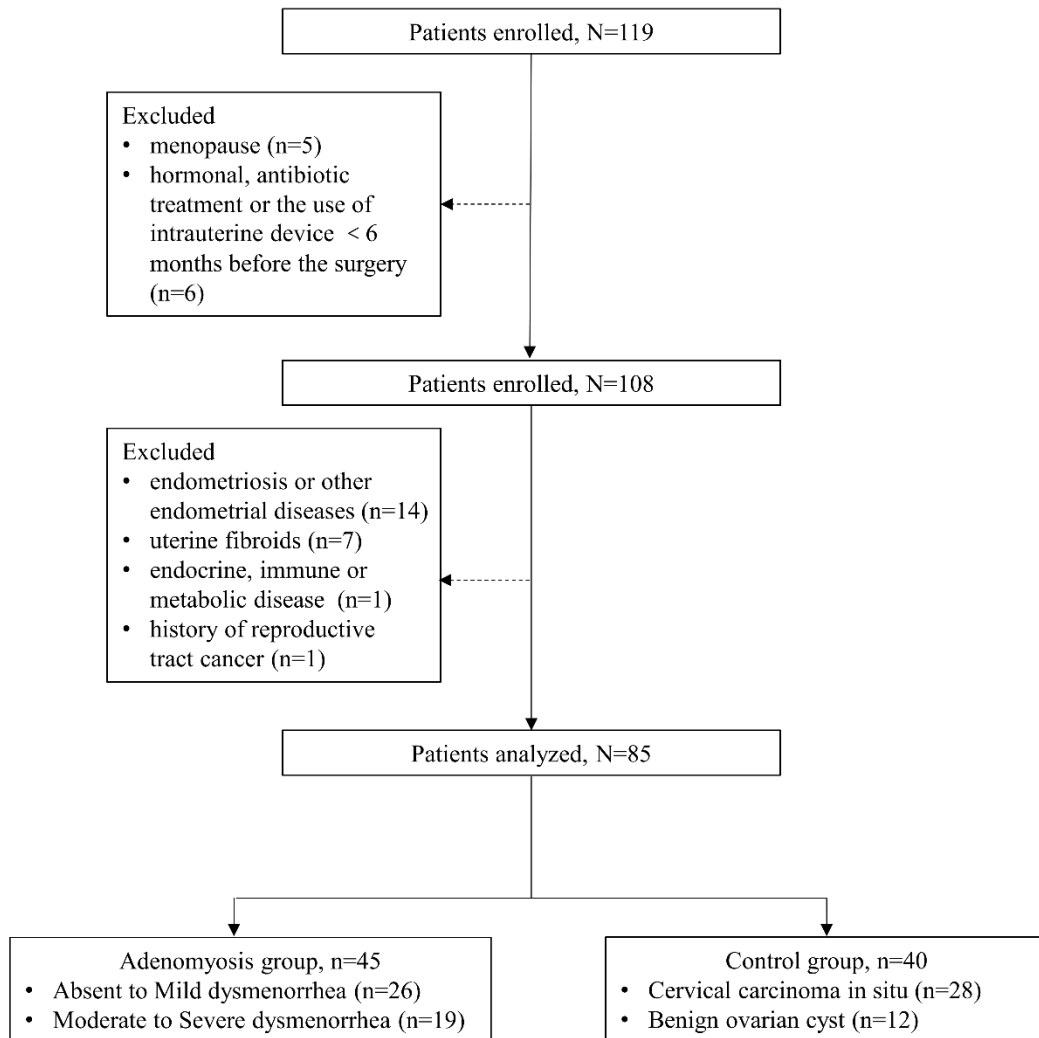

**Supplemental Figure 2.** Quantitative analysis of the mean optical density (MOD) of PAI-1 between the proliferative phase and secretory phase

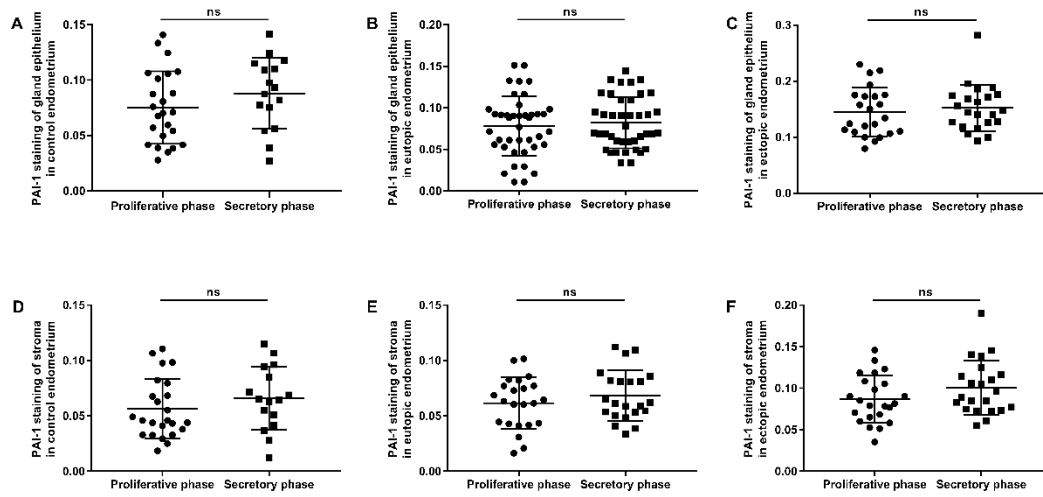

Supplement: 43032_2021_513_MOESM1_ESM.pdf [file 43032_2021_513_MOESM1_ESM.pdf]
